# Supplementary material for: Mechanism of bisphosphonate-related osteonecrosis of the jaw (BRONJ) revealed by targeted removal of legacy bisphosphonate from jawbone using competing inert hydroxymethylene diphosphonate
Source: eLife journal article supplement (doi:10.7554/elife.76207), 2022-08-26
Supplement: supp [file elife-76207-supp-v1.zip]

Fig.4F

|           | 1 week | 2 week |          | 4 week |          |
|-----------|--------|--------|----------|--------|----------|
| Treatment | -      | -      | HMDP-DNV | -      | HMDP-DNV |
|           | 25.43  | 44.50  | 32.83    | 55.92  | 4.44     |
|           | 38.15  | 43.53  | 31.83    | 62.96  | 1.83     |
|           | 49.70  | 42.19  | 18.71    | 60.81  | 3.75     |
|           | 29.28  | 42.34  | 32.30    | 49.02  | 3.42     |
|           | 31.50  | 42.56  | 28.19    | 80.95  | 3.35     |
|           |        | 61.21  | 37.14    | 52.79  | 3.33     |
