# Supplementary material for: Mechanism of bisphosphonate-related osteonecrosis of the jaw (BRONJ) revealed by targeted removal of legacy bisphosphonate from jawbone using competing inert hydroxymethylene diphosphonate
Source: eLife journal article supplement (doi:10.7554/elife.76207), 2022-08-26
Supplement: supp [file elife-76207-supp-v1.zip]

Fig.1D

|  | 10 $\mu$ M HMDP |          |          | Blank    |
|--|-----------------|----------|----------|----------|
|  | 0x              | 1x       | 2x       |          |
|  | 1.60E+10        | 1.13E+10 | 6.89E+09 | 1.57E+09 |
|  | 2.10E+10        | 1.09E+10 | 7.44E+09 | 1.66E+09 |
|  | 2.13E+10        | 1.22E+10 | 6.45E+09 | 1.64E+09 |
