# Supplementary material for: Mechanism of bisphosphonate-related osteonecrosis of the jaw (BRONJ) revealed by targeted removal of legacy bisphosphonate from jawbone using competing inert hydroxymethylene diphosphonate
Source: eLife journal article supplement (doi:10.7554/elife.76207), 2022-08-26
Supplement: supp [file elife-76207-supp-v1.zip]

Fig.1E

| ①        |          |          | ②        |          |          |
|----------|----------|----------|----------|----------|----------|
| Vehicle  | HMDP 1 x | HMDP 2x  | Vehicle  | HMDP 1 x | HMDP 2x  |
| 2.40E+09 | 2.98E+09 | 3.32E+09 | 2.89E+08 | 2.69E+08 | 2.38E+08 |
| 2.51E+09 | 2.65E+09 | 2.84E+09 | 3.30E+08 | 2.83E+08 | 3.09E+08 |
| 3.55E+09 | 3.55E+09 | 3.18E+09 | 3.15E+08 | 3.40E+08 | 2.66E+08 |

| ③        |          |          | ④        |          |          |
|----------|----------|----------|----------|----------|----------|
| Vehicle  | HMDP 1 x | HMDP 2x  | Vehicle  | HMDP 1 x | HMDP 2x  |
| 1.75E+08 | 1.60E+08 | 1.70E+08 | 1.36E+08 | 1.46E+08 | 1.47E+08 |
| 1.69E+08 | 1.43E+08 | 1.52E+08 | 1.34E+08 | 1.08E+08 | 1.21E+08 |
| 1.64E+08 | 1.60E+08 | 1.32E+08 | 1.36E+08 | 1.38E+08 | 1.19E+08 |

| ⑤        |          |          | ⑥        |          |          |
|----------|----------|----------|----------|----------|----------|
| Vehicle  | HMDP 1 x | HMDP 2x  | Vehicle  | HMDP 1 x | HMDP 2x  |
| 1.57E+08 | 3.85E+08 | 4.97E+08 | 1.42E+08 | 1.72E+08 | 2.13E+08 |
| 1.09E+08 | 3.77E+08 | 3.92E+08 | 1.25E+08 | 2.27E+08 | 2.44E+08 |
| 1.92E+08 | 2.74E+08 | 4.36E+08 | 1.11E+08 | 2.15E+08 | 2.28E+08 |

| ⑦        |          |          | ⑧        |          |          |
|----------|----------|----------|----------|----------|----------|
| Vehicle  | HMDP 1 x | HMDP 2x  | Vehicle  | HMDP 1 x | HMDP 2x  |
| 1.02E+08 | 1.89E+08 | 1.96E+08 | 1.21E+08 | 1.50E+08 | 1.83E+08 |
| 1.21E+08 | 1.12E+08 | 1.87E+08 | 1.06E+08 | 9.96E+07 | 1.55E+08 |
| 9.87E+07 | 1.03E+08 | 1.77E+08 | 8.55E+07 | 9.24E+07 | 1.42E+08 |

| ⑨        |          |          | ⑩        |          |          |
|----------|----------|----------|----------|----------|----------|
| Vehicle  | HMDP 1 x | HMDP 2x  | Vehicle  | HMDP 1 x | HMDP 2x  |
| 9.80E+07 | 1.39E+08 | 3.21E+08 | 5.90E+07 | 9.43E+07 | 1.57E+08 |
| 9.40E+07 | 1.64E+08 | 3.09E+08 | 8.56E+07 | 1.06E+08 | 1.25E+08 |
| 9.89E+07 | 9.98E+07 | 1.78E+08 | 1.11E+08 | 1.23E+08 | 1.05E+08 |

| ⑪        |          |          | ⑫        |          |          |
|----------|----------|----------|----------|----------|----------|
| Vehicle  | HMDP 1 x | HMDP 2x  | Vehicle  | HMDP 1 x | HMDP 2x  |
| 8.37E+07 | 8.67E+07 | 1.36E+08 | 4.02E+07 | 4.84E+07 | 1.26E+08 |
| 9.44E+07 | 9.38E+07 | 9.27E+07 | 7.15E+07 | 8.90E+07 | 9.01E+07 |
| 1.03E+08 | 9.37E+07 | 8.95E+07 | 9.03E+07 | 9.57E+07 | 1.01E+08 |
