# Supplementary material for: Mechanism of bisphosphonate-related osteonecrosis of the jaw (BRONJ) revealed by targeted removal of legacy bisphosphonate from jawbone using competing inert hydroxymethylene diphosphonate
Source: eLife journal article supplement (doi:10.7554/elife.76207), 2022-08-26
Supplement: supp [file elife-76207-supp-v1.zip]

Fig.4E

|           | 1 week | 2 week |          | 4 week |          |
|-----------|--------|--------|----------|--------|----------|
| Treatment | -      | -      | HMDP-DNV | -      | HMDP-DNV |
|           | 5.86   | 9.01   | 63.42    | 41.96  | 47.09    |
|           | 6.10   | 13.21  | 60.10    | 51.79  | 67.87    |
|           | 1.24   | 12.28  | 53.16    | 61.63  | 54.57    |
|           | 13.58  | 7.65   | 66.26    | 48.03  | 63.13    |
|           | 12.61  | 24.07  | 51.97    | 62.51  | 65.21    |
|           |        | 22.99  | 44.26    | 27.54  | 32.84    |
