# Supplementary material for: Mechanism of bisphosphonate-related osteonecrosis of the jaw (BRONJ) revealed by targeted removal of legacy bisphosphonate from jawbone using competing inert hydroxymethylene diphosphonate
Source: eLife journal article supplement (doi:10.7554/elife.76207), 2022-08-26
Supplement: supp [file elife-76207-supp-v1.zip]

Fig.1C

| BV/TV (%) | ZOL  | HMDP | Vehicle |
|-----------|------|------|---------|
|           | 7.31 | 2.30 | 1.25    |
|           | 5.49 | 1.74 | 1.68    |
|           | 8.60 | 3.15 | 1.62    |
|           | 4.87 | 1.83 | 4.91    |

| ConnD (1/mm) | ZOL    | HMDP | Vehicle |
|--------------|--------|------|---------|
|              | 96.35  | 3.82 | 0.52    |
|              | 65.61  | 4.91 | 2.60    |
|              | 107.98 | 7.19 | 1.12    |
|              | 62.13  | 0.55 | 54.19   |

| Tb.N (1/mm) | ZOL  | HMDP | Vehicle |
|-------------|------|------|---------|
|             | 4.50 | 3.58 | 3.14    |
|             | 4.00 | 3.53 | 3.57    |
|             | 4.04 | 3.63 | 3.35    |
|             | 3.74 | 3.52 | 4.44    |

| Tb.Th (mm) | ZOL   | HMDP  | Vehicle |
|------------|-------|-------|---------|
|            | 0.037 | 0.029 | 0.032   |
|            | 0.037 | 0.025 | 0.029   |
|            | 0.042 | 0.032 | 0.025   |
|            | 0.037 | 0.026 | 0.032   |

| Tb.Sp (mm) | ZOL  | HMDP | Vehicle |
|------------|------|------|---------|
|            | 0.22 | 0.29 | 0.32    |
|            | 0.25 | 0.28 | 0.29    |
|            | 0.25 | 0.28 | 0.30    |
|            | 0.27 | 0.29 | 0.23    |
