# Supplementary material for: Mechanism of bisphosphonate-related osteonecrosis of the jaw (BRONJ) revealed by targeted removal of legacy bisphosphonate from jawbone using competing inert hydroxymethylene diphosphonate
Source: eLife journal article supplement (doi:10.7554/elife.76207), 2022-08-26
Supplement: supp [file elife-76207-supp-v1.zip]

Fig.3J

| ZOL IV               | -     | -     | +         | +          | +        |
|----------------------|-------|-------|-----------|------------|----------|
| Intra-oral treatment | -     | -     | Empty-DNV | HMDP alone | HMDP-DNV |
|                      | 24.20 | 20.81 | 26.67     | 53.00      | 22.69    |
|                      | 15.76 | 21.41 | 40.34     | 24.14      | 26.43    |
|                      | 15.34 | 10.97 | 34.42     | 38.01      | 24.18    |
|                      |       |       | 43.35     | 42.78      | 31.14    |
|                      |       |       | 40.46     | 40.39      | 15.45    |
|                      |       |       | 35.21     | 40.39      | 18.57    |
