# Supplementary material for: Mechanism of bisphosphonate-related osteonecrosis of the jaw (BRONJ) revealed by targeted removal of legacy bisphosphonate from jawbone using competing inert hydroxymethylene diphosphonate
Source: eLife journal article supplement (doi:10.7554/elife.76207), 2022-08-26
Supplement: supp [file elife-76207-supp-v1.zip]

Fig.4G

| Treatment | -     | HMDP-DNV |
|-----------|-------|----------|
|           | 8.63  | 14.88    |
|           | 16.28 | 5.75     |
|           | 13.11 | 10.61    |
|           | 11.26 | 12.82    |
|           | 14.62 | 18.72    |
|           | 12.71 | 15.03    |
