# Supplementary material for: Mechanism of bisphosphonate-related osteonecrosis of the jaw (BRONJ) revealed by targeted removal of legacy bisphosphonate from jawbone using competing inert hydroxymethylene diphosphonate
Source: eLife journal article supplement (doi:10.7554/elife.76207), 2022-08-26
Supplement: supp [file elife-76207-supp-v1.zip]

Fig.4D

|           | 1 week | 2 week |          | 4 week |          |
|-----------|--------|--------|----------|--------|----------|
| Treatment | -      | -      | HMDP-DNV | -      | HMDP-DNV |
|           | 234.34 | 300.43 | 95.79    | 281.07 | 44.12    |
|           | 155.07 | 220.31 | 43.25    | 159.82 | 48.87    |
|           | 251.39 | 71.89  | 39.12    | 139.36 | 1.38     |
|           | 203.34 | 264.62 | 43.17    | 150.64 | 15.04    |
|           | 111.39 | 201.76 | 88.95    | 196.45 | 49.13    |
|           |        | 196.19 | 170.44   | 166.53 | 2.01     |
