# Supplementary material for: Mechanism of bisphosphonate-related osteonecrosis of the jaw (BRONJ) revealed by targeted removal of legacy bisphosphonate from jawbone using competing inert hydroxymethylene diphosphonate
Source: eLife journal article supplement (doi:10.7554/elife.76207), 2022-08-26
Supplement: supp [file elife-76207-supp-v1.zip]

Fig.2F

|  |        | AF647-ZOL-DNV |            |             |
|--|--------|---------------|------------|-------------|
|  | CTRL   | 25 $\mu$ M    | 75 $\mu$ M | 200 $\mu$ M |
|  | 44.981 | 52.945        | 50.049     | 60.843      |
|  | 54.789 | 60.569        | 60.394     | 58.686      |
|  | 39.503 | 59.033        | 70.389     | 64.529      |
|  | 51.885 | 47.985        | 62.893     | 57.441      |
|  | 40.859 | 39.689        | 49.9       | 53.983      |
|  |        | 45.693        | 52.586     | 52.553      |
