# Supplementary material for: Mechanism of bisphosphonate-related osteonecrosis of the jaw (BRONJ) revealed by targeted removal of legacy bisphosphonate from jawbone using competing inert hydroxymethylene diphosphonate
Source: eLife journal article supplement (doi:10.7554/elife.76207), 2022-08-26
Supplement: supp [file elife-76207-supp-v1.zip]

Fig. 5D

|           | 2 week |          | 4 week |          |
|-----------|--------|----------|--------|----------|
| Treatment | -      | HMDP-DNV | -      | HMDP-DNV |
|           | 9      | 10       | 9      | 0        |
|           | 8      | 4        | 8      | 2        |
|           | 13     | 4        | 15     | 1        |
|           | 8      | 5        | 9      | 0        |
|           | 8      | 6        | 8      | 1        |
