# Supplementary material for: Mechanism of bisphosphonate-related osteonecrosis of the jaw (BRONJ) revealed by targeted removal of legacy bisphosphonate from jawbone using competing inert hydroxymethylene diphosphonate
Source: eLife journal article supplement (doi:10.7554/elife.76207), 2022-08-26
Supplement: supp [file elife-76207-supp-v1.zip]

Fig. 5E

| Zone A    | 2 week |          | 4 week |          |
|-----------|--------|----------|--------|----------|
| Treatment | -      | HMDP-DNV | -      | HMDP-DNV |
|           | 6      | 8        | 5      | 0        |
|           | 4      | 4        | 4      | 2        |
|           | 8      | 4        | 12     | 1        |
|           | 5      | 5        | 6      | 0        |
|           | 3      | 6        | 4      | 0        |

| Zone B    | 2 week |          | 4 week |          |
|-----------|--------|----------|--------|----------|
| Treatment | -      | HMDP-DNV | -      | HMDP-DNV |
|           | 3      | 2        | 4      | 0        |
|           | 4      | 0        | 4      | 0        |
|           | 5      | 0        | 3      | 0        |
|           | 3      | 0        | 3      | 0        |
|           | 5      | 0        | 4      | 1        |
