# Supplementary material for: Mechanism of bisphosphonate-related osteonecrosis of the jaw (BRONJ) revealed by targeted removal of legacy bisphosphonate from jawbone using competing inert hydroxymethylene diphosphonate
Source: eLife journal article supplement (doi:10.7554/elife.76207), 2022-08-26
Supplement: supp [file elife-76207-supp-v1.zip]

Fig.3I

| ZOL IV    | -     | -     | +         | +          | +        |
|-----------|-------|-------|-----------|------------|----------|
| Treatment | -     | -     | Empty-DNV | HMDP alone | HMDP-DNV |
|           | 19.69 | 91.52 | 50.58     | 1.03       | 57.77    |
|           | 14.40 | 76.34 | 6.56      | 3.19       | 79.70    |
|           | 7.13  | 47.94 | 18.16     | 45.08      | 35.28    |
|           |       |       | 24.74     | 1.74       | 50.65    |
|           |       |       | 33.83     | 21.03      | 88.97    |
|           |       |       | 1.63      | 55.96      | 90.58    |
