# Supplementary material for: Mechanism of bisphosphonate-related osteonecrosis of the jaw (BRONJ) revealed by targeted removal of legacy bisphosphonate from jawbone using competing inert hydroxymethylene diphosphonate
Source: eLife journal article supplement (doi:10.7554/elife.76207), 2022-08-26
Supplement: supp [file elife-76207-supp-v1.zip]

Fig.4C

|           | 1 week | 2 week |          | 4 week |          |
|-----------|--------|--------|----------|--------|----------|
| Treatment | -      | -      | HMDP-DNV | -      | HMDP-DNV |
|           | 41.24  | 29.26  | 1.52     | 58.37  | 2.17     |
|           | 45.18  | 53.87  | 1.88     | 6.70   | 3.49     |
|           | 46.69  | 13.23  | 5.94     | 45.88  | 0.66     |
|           | 41.16  | 46.56  | 2.74     | 8.04   | 1.45     |
|           | 56.65  | 49.62  | 0.99     | 15.50  | 3.22     |
|           |        | 43.57  | 2.13     | 12.33  | 1.75     |
