# Supplementary material for: Mechanism of bisphosphonate-related osteonecrosis of the jaw (BRONJ) revealed by targeted removal of legacy bisphosphonate from jawbone using competing inert hydroxymethylene diphosphonate
Source: eLife journal article supplement (doi:10.7554/elife.76207), 2022-08-26
Supplement: supp [file elife-76207-supp-v1.zip]

Fig.1F

|  | 10 $\mu$ M HMDP |      |       | Blank |
|--|-----------------|------|-------|-------|
|  | 0x              | 1x   | 2x    |       |
|  | 1.92            | 5.02 | 16.35 | 14.10 |
|  | 1.53            | 6.29 | 9.67  | 15.05 |
|  | 0.93            | 5.19 | 11.21 | 15.63 |
