# Supplementary material for: Mechanism of bisphosphonate-related osteonecrosis of the jaw (BRONJ) revealed by targeted removal of legacy bisphosphonate from jawbone using competing inert hydroxymethylene diphosphonate
Source: eLife journal article supplement (doi:10.7554/elife.76207), 2022-08-26
Supplement: supp [file elife-76207-supp-v1.zip]

Fig.2G

|  | CTRL     | AF647-ZOL-<br>nDNV in<br>MQW | AF647-ZOL-<br>nDNV in<br>PEG | AF647-ZOL-<br>DNV in MQW | AF647-ZOL-<br>DNV in PEG |
|--|----------|------------------------------|------------------------------|--------------------------|--------------------------|
|  | 53.29705 | 57.83661                     | 53.81623                     | 75.295                   | 54.439                   |
|  | 54.56349 | 58.91001                     | 47.95108                     | 76.978                   | 55.604                   |
|  | 48.33326 | 57.22558                     | 55.82214                     | 61.764                   | 84.594                   |
|  | 51.90918 | 55.22512                     | 49.63551                     | 69.914                   | 65.185                   |
|  | 48.91939 | 47.55332                     | 51.14558                     | 76.731                   | 54.374                   |
|  | 52.75763 | 57.63268                     | 49.04705                     | 68.142                   | 57.87                    |
|  | 54.751   | 55.77855                     | 64.48561                     | 67.624                   | 59.037                   |
|  | 51.553   | 51.89984                     | 49.57013                     | 54.127                   | 52.335                   |
|  | 50.353   |                              |                              |                          |                          |
|  | 49.863   |                              |                              |                          |                          |
